# Supplementary material for: Comparative Analysis of the Metabolome and Transcriptome between the Green and Yellow-Green Regions of Variegated Leaves in a Mutant Variety of the Tree Species Pteroceltis tatarinowii
Source: MDPI journal article supplement (doi:10.3390/ijms23094950), 2022-04-29
Supplement: s1 [file s1]

**Table S1.** Statistics of output data of six samples.

| Sample | Raw reads | Raw bases  | Clean reads | Clean bases | Error rate (%) | Q20(%) | Q30(%) | GC content (%) |
|--------|-----------|------------|-------------|-------------|----------------|--------|--------|----------------|
| GR1    | 43955710  | 6637312210 | 43631114    | 6485332563  | 0.0246         | 98.21  | 94.46  | 45.52          |
| GR2    | 43253262  | 6531242562 | 42949114    | 6381978387  | 0.0248         | 98.14  | 94.26  | 45.17          |
| GR3    | 42955164  | 6486229764 | 42633900    | 6340489258  | 0.0246         | 98.21  | 94.48  | 44.70          |
| YG1    | 44365454  | 6699183554 | 43951406    | 6536035110  | 0.0246         | 98.19  | 94.54  | 45.09          |
| YG2    | 52296666  | 7896796566 | 51890274    | 7700528119  | 0.0245         | 98.24  | 94.55  | 45.32          |
| YG3    | 41094562  | 6205278862 | 40772644    | 6058882218  | 0.0246         | 98.21  | 94.44  | 44.93          |

Note: GR indicates for the green region of the leaf, and YG indicates the yellow-green region of the leaf. Raw reads: the number of reads in the raw data; Raw bases: the total number of bases in the raw data. Clean reads: the number of high-quality reads after filtering the raw data; Clean Bases: the total number of bases in high-quality reads; Error rate: the overall sequencing error rate; Q20: the percentage of bases with a Qphred value of not less than 20 to the total number of bases; Q30: the percentage of bases with a Qphred value of greater than 30 to the total number of bases; GC Content: the sum of the number of G and C in high-quality reads is the percentage of the total number of bases.

**Table S2.** Statistics of the spliced transcriptome.

| Type                        | Unigene                 | Transcript               |
|-----------------------------|-------------------------|--------------------------|
| Total number                | 41833                   | 80323                    |
| Total base                  | 47941007                | 1.14E+08                 |
| Largest length (bp)         | 13639                   | 13639                    |
| Smallest length (bp)        | 201                     | 201                      |
| Average length (bp)         | 1146.01                 | 1424.1                   |
| N50 length (bp)             | 2154                    | 2161                     |
| E90N50 length (bp)          | 2728                    | 2297                     |
| Fragment mapped percent (%) | 61.409                  | 76.463                   |
| GC percent (%)              | 38.93                   | 39.22                    |
| TransRate score             | 0.29255                 | 0.36925                  |
| BUSCO score                 | C:68.1%[S:66.7%;D:1.4%] | C:90.9%[S:50.9%;D:40.0%] |

Note: GR indicates for the green region of the leaf, and YG indicates the yellow-green region of the leaf.

**Table S3.** Statistics of transcriptome annotation results.

|            | Exp_Unigene<br>number(percent) | Exp_Transcript<br>number(percent) | All_Unigene<br>number(percent) | All_Transcript<br>number(percent) |
|------------|--------------------------------|-----------------------------------|--------------------------------|-----------------------------------|
| GO         | 18848(0.4614)                  | 47847(0.6083)                     | 19002(0.4542)                  | 48559(0.6045)                     |
| KEGG       | 9405(0.2302)                   | 26448(0.3363)                     | 9460(0.2261)                   | 26852(0.3343)                     |
| COG        | 18143(0.4442)                  | 47724(0.6068)                     | 18257(0.4364)                  | 48402(0.6026)                     |
| NR         | 22520(0.5513)                  | 56366(0.7166)                     | 22701(0.5427)                  | 57168(0.7117)                     |
| Swiss-Prot | 16965(0.4153)                  | 44156(0.5614)                     | 17064(0.4079)                  | 44797(0.5577)                     |
| Pfam       | 17030(0.4169)                  | 43374(0.5515)                     | 17112(0.4091)                  | 43972(0.5474)                     |
| Total_anno | 22736(0.5566)                  | 56655(0.7203)                     | 22926(0.548)                   | 57467(0.7154)                     |

Note: GO: Gene Ontology; KEGG: Kyoto Encyclopedia of Genes and Genomes; COG: Cluster of Orthologous Groups of proteins; NR: NCBI non-redundant protein sequences; Swiss-Prot: a

manually annotated and reviewed protein sequence database;  
 Pfam: Protein families database.

**Table S4.** Primer sequences of target genes.

| Gene             | Description                            | Gene ID                 | Sequence<br>(5'→3')                                        | Length<br>(bp) |
|------------------|----------------------------------------|-------------------------|------------------------------------------------------------|----------------|
| <i>E2.4.1.13</i> | Sucrose synthase                       | TRINITY_DN8933_c0_g1    | F: ACCGCCACCTCTCTGCTAAAC<br>R: CTCATTCTCCAATGCACGAAC       | 467            |
| <i>GST</i>       | Glutathione S-transferase              | TRINITY_DN827_c0_g2     | F: CAGATGAAGAGGGAAAGAAAGC<br>R: GGATAACACCACTAACAGCAGGG    | 270            |
| <i>MaeB 1</i>    | Malic oxidoreductase                   | TRINITY_DN4277_c0_g1    | F: GGCACCTCACATTTTCCATTAGTT<br>R: CCAGATCCTCTTTCGTGTCTCTTC | 243            |
| <i>MaeB 2</i>    | Malic oxidoreductase                   | TRINITY_DN7682_c0_g1    | F: AATTGGAACATCCGGAGTAGG<br>R: CTTTAGGCTGAGGAAGGCGAG       | 473            |
| <i>E3.1.1.14</i> | Chlorophyllase                         | TRINITY_DN5431_c0_g1    | F: CACGAAACCAAGCCTCACATC<br>R: ACCATAGCCCTTAGCCACAAA       | 198            |
| <i>PetH</i>      | encoding ferredoxin--NADP<br>reductase | TRINITY_DN10087_c0_g2   | F: CTACTGGGACTGGGGTTGCTC<br>R: CTTTAAGGCGTTTTCGATCGG       | 332            |
| <i>PAL</i>       | Phenylalanine ammonia-lyase            | TRINITY_DN7735_c0_g1    | F: TGAGGCATTTGGAGGAGAATTT<br>R: TTTTTCATCAGCGGATAGGTA      | 203            |
| <i>4CL</i>       | 4-coumarate CoA ligase                 | TRINITY_DN3922_c0_g1    | F: TCCCTCTCCACACTTACTGCTTC<br>R: GGTATGTCTTTCTCATTGGCCTC   | 463            |
| <i>HCT</i>       | Transferase                            | TRINITY_DN13017_c0_g1   | F: TCCTAACCCCTTTTTTACCCTCTG<br>R: CCTCTTGCTATTACGTTTCTCG   | 434            |
| <i>CYP81E1_7</i> | Cytochrome P450                        | TRINITY_DN38_c0_g1      | F: TCGAGATCAGAAGAGACGAGATAA<br>R: TGAGACTCCTGCAAAGAGAGTAAA | 409            |
| <i>CHS</i>       | Chalcone synthase                      | TRINITY_DN28663_c0_g1   | F: CCAAGGCCAAGATCACCCAC<br>R: TCTCCGAGCAAACGACCAAT         | 219            |
| <i>AHP</i>       | histidine phosphotransferase           | TRINITY_DN8549_c0_g1    | F: CTCCAAGATGATGCTAATCCAAAC<br>R: TTGTGCTACTTCCCTTCAACTGAT | 163            |
| <i>TAF</i>       | Transcription initiation factor        | TRINITY_DN3950_c0_g1_i2 | F: TGGAAACAGGCAAGTCAGAAAG<br>R: GAAGAATCGTCGGAGTGGAGAG     | 148            |

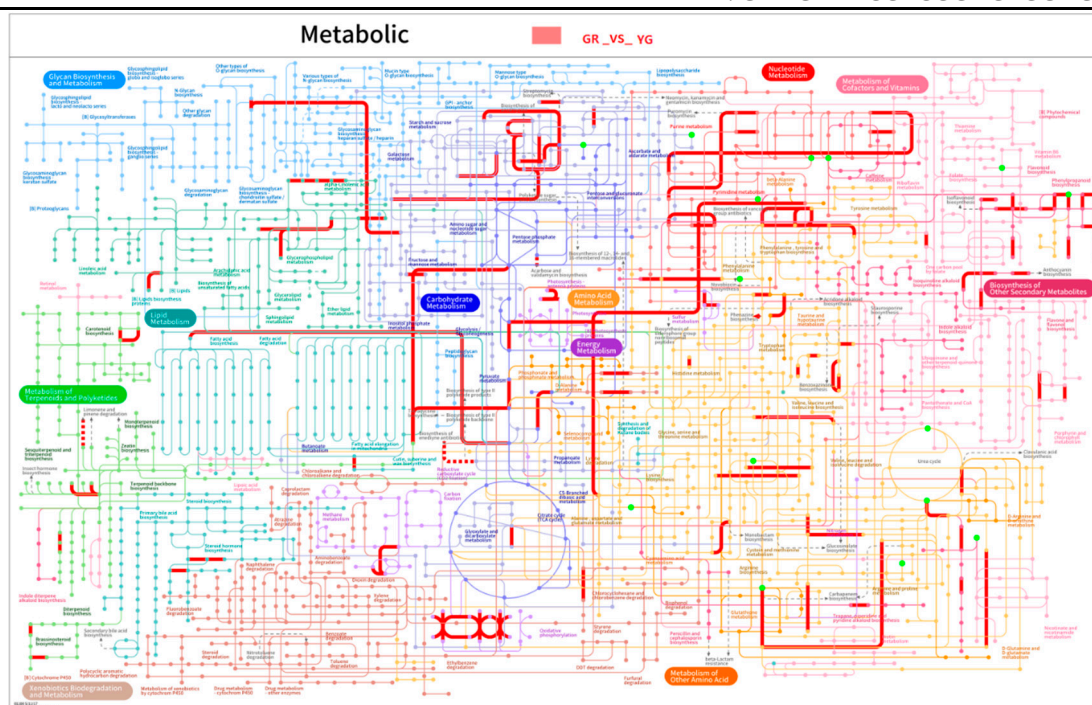

**Figure S1.** Diagram of iPath integrated analysis. GR indicates for the green region of the leaf, and YG indicates the yellow-green region of the leaf.

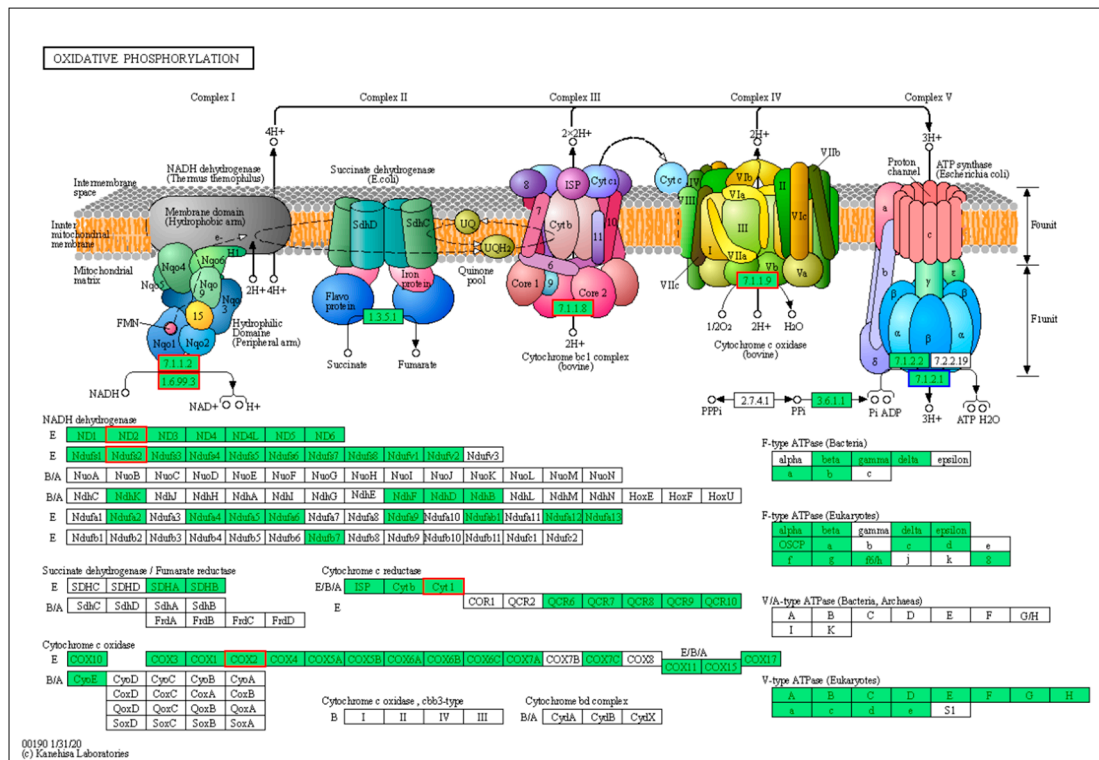

**Figure S2.** Oxidative phosphorylation pathway.
